# Supplementary material for: Antibiofilm and antivirulence activities of laminarin-gold nanoparticles in standard and host-mimicking media
Source: Springer Nature journal article supplement (doi:10.1007/s00253-024-13050-4), 2024-02-13
Supplement: MOESM1 [file 253_2024_13050_MOESM1_ESM.pdf]

**Supplementary Information:**

**Title: Antibiofilm and antivirulence activities of laminarin-gold nanoparticles in standard and host-mimicking media**

**Authors:** Nazia Tabassum<sup>1,2</sup>, Fazlurrahman Khan<sup>1,2,3\*</sup>, Geum-Jae Jeong<sup>4</sup>, Dokyung Oh<sup>1,2,4</sup> and Young-Mog Kim<sup>1,2,4\*</sup>

<sup>1</sup>*Marine Integrated Biomedical Technology Center, The National Key Research Institutes in Universities, Pukyong National University, Busan 48513, Republic of Korea.*

<sup>2</sup>*Research Center for Marine Integrated Bionics Technology, Pukyong National University, Busan 48513, Republic of Korea*

<sup>3</sup>*Institute of Fisheries Sciences, Pukyong National University, Busan 48513, Republic of Korea*

<sup>4</sup>*Department of Food Science and Technology, Pukyong National University, Busan 48513, Republic of Korea*

\*Corresponding authors: Fazlurrahman Khan and Young-Mog Kim

Phone: +82-51-629-5832; Fax: +82-51-629-5824

E-mail: fkhan055@pknu.ac.kr and ymkim@pknu.ac.kr

**Running title:** Antibiofilm and antivirulence properties of Lam-AuNPs

**Table S1.** The MIC values of Lam-AuNPs in complex and various types of hosts-mimicking media against various pathogenic bacteria, which are multi-drug resistance

| Synthetic media         | MIC (µg/mL) |     |     |      |     |      |       |
|-------------------------|-------------|-----|-----|------|-----|------|-------|
|                         | PA          | SA  | SM  | CA   | EC  | KP   | LM    |
| TSB/PDB                 | 256         | 256 | 512 | 1024 | 256 | 1024 | 512   |
| Artificial sputum media | 512         | 512 | ND  | 128  | 128 | 512  | 256   |
| Synthetic human urine   | 128         | 128 | ND  | 128  | 32  | 16   | > 512 |
| Artificial saliva       | 4           | 4   | 128 | 512  | 8   | 4    | > 2.0 |

ND, Note determined; TSB, tryptic soya broth; PDB, potato dextrose broth; PA, *Pseudomonas aeruginosa*; SA, *Staphylococcus aureus*; SM, *Streptococcus mutans*; CA, *Candida albicans*; EC, *Escherichia coli*; KP, *Klebsiella pneumoniae*; and LM, *Listeria monocytogenes*.

The MIC value was determined by the micro broth dilution method by incubating the cell culture. The MIC value in the standard growth media was decided based on the OD<sub>600</sub> values. However, the colony-counting method was used in the host-mimicking media to determine the MIC values (Tabassum et al. 2023).

**Fig. S1.** Steps involved in the synthesis of Lam-AuNPs and its instrumental characterization

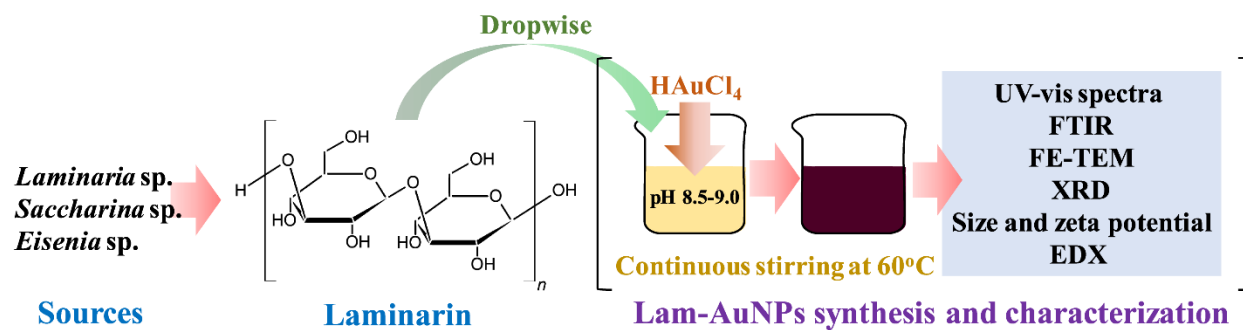

## References

Tabassum N, Jeong G-J, Jo D-M, Khan F, Kim Y-M (2023a) Treatment of *Staphylococcus aureus* and *Candida albicans* polymicrobial biofilms by phloroglucinol-gold nanoparticles. Microb Pathog 185:106416 doi: 10.1016/j.micpath.2023.106416
